# Supplementary material for: In-silico prediction and modeling of the Entamoeba histolytica proteins: Serine-rich Entamoeba histolytica protein and 29 kDa Cysteine-rich protease
Source: PeerJ journal article supplement (doi:10.7717/peerj.3160), 2017-06-28
Supplement: Additional_file_6-side-chain_parameters_of_SREHP_and_Eh29.pdf [file Additional_file_6-side-chain_parameters_of_SREHP_and_Eh29.pdf]

## Side-chain parameters

23\_128\_72

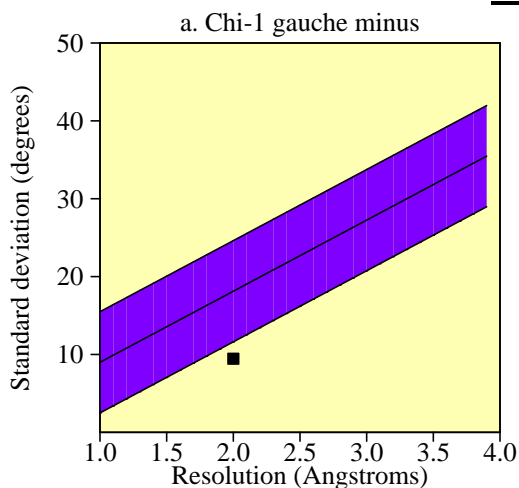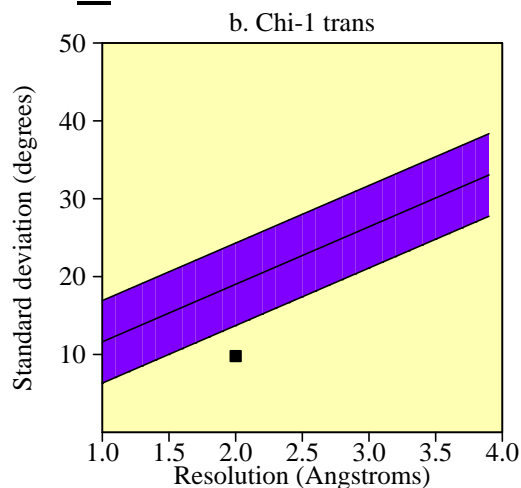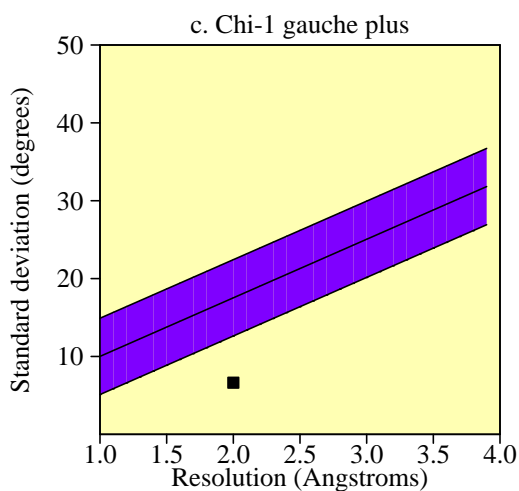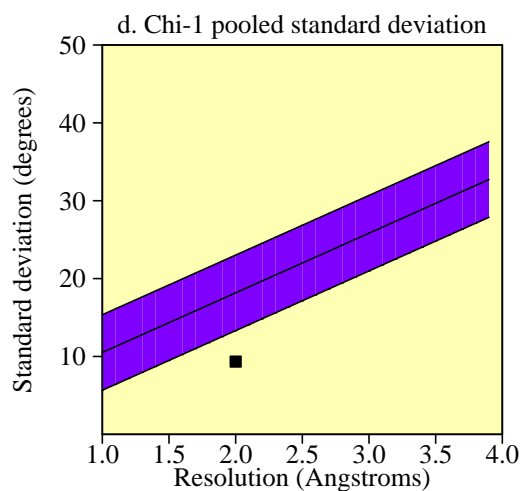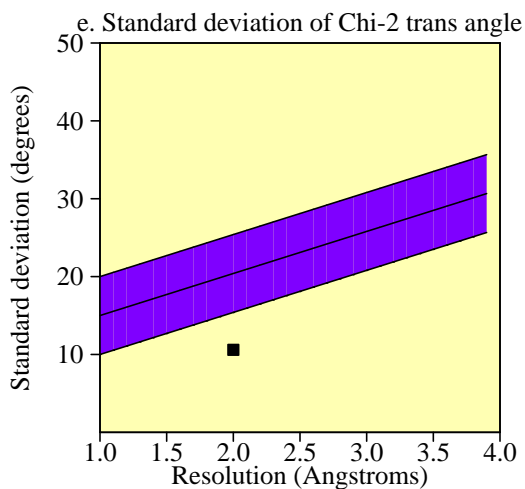

23\_128\_72

## Plot statistics

| Stereochemical parameter     | No. of data pts | Parameter value | Comparison values |            | No. of band widths from mean |        |
|------------------------------|-----------------|-----------------|-------------------|------------|------------------------------|--------|
|                              |                 |                 | Typical value     | Band width |                              |        |
| a. Chi-1 gauche minus st dev | 42              | 9.5             | 18.1              | 6.5        | -1.3                         | BETTER |
| b. Chi-1 trans st dev        | 54              | 9.8             | 19.0              | 5.3        | -1.7                         | BETTER |
| c. Chi-1 gauche plus st dev  | 93              | 6.6             | 17.5              | 4.9        | -2.2                         | BETTER |
| d. Chi-1 pooled st dev       | 189             | 9.3             | 18.2              | 4.8        | -1.8                         | BETTER |
| e. Chi-2 trans st dev        | 49              | 10.6            | 20.4              | 5.0        | -2.0                         | BETTER |

# Side-chain parameters

## Model\_12

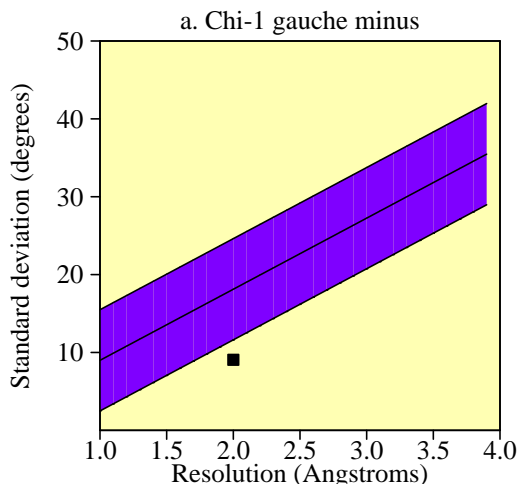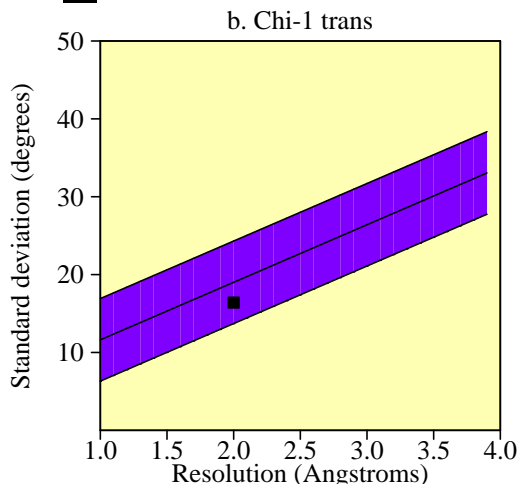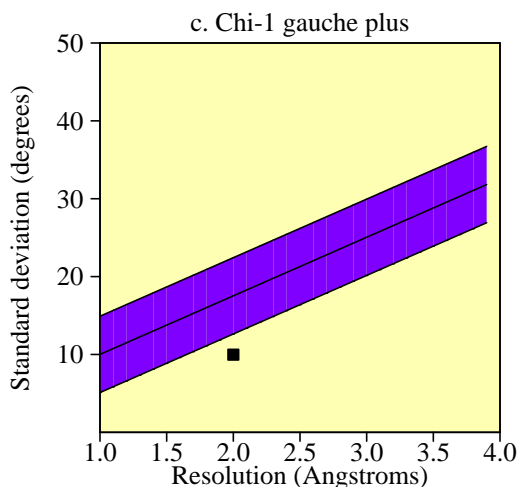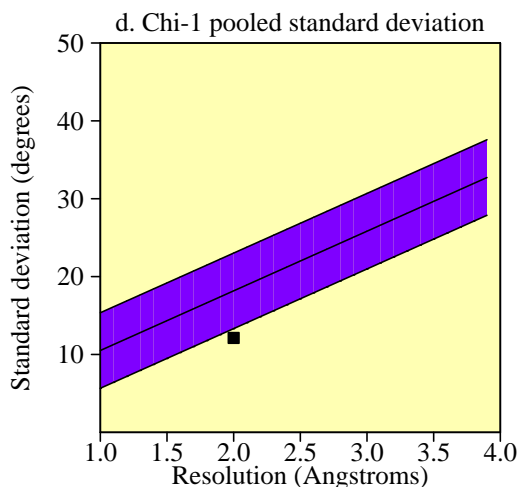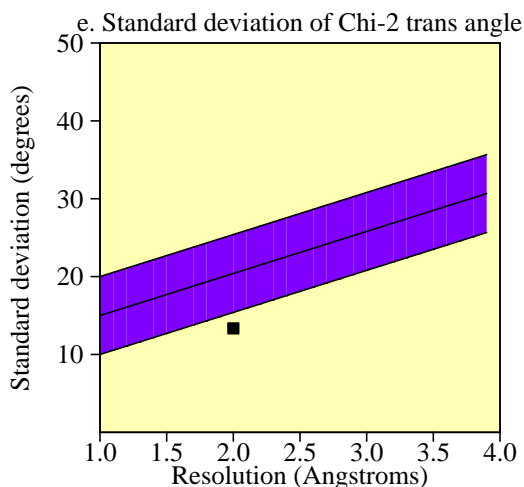

Model\_12

### Plot statistics

| Stereochemical parameter     | No. of data pts | Parameter value | Comparison values |            | No. of band widths from mean |        |
|------------------------------|-----------------|-----------------|-------------------|------------|------------------------------|--------|
|                              |                 |                 | Typical value     | Band width |                              |        |
| a. Chi-1 gauche minus st dev | 30              | 9.1             | 18.1              | 6.5        | -1.4                         | BETTER |
| b. Chi-1 trans st dev        | 54              | 16.4            | 19.0              | 5.3        | -0.5                         | Inside |
| c. Chi-1 gauche plus st dev  | 70              | 10.0            | 17.5              | 4.9        | -1.5                         | BETTER |
| d. Chi-1 pooled st dev       | 154             | 12.1            | 18.2              | 4.8        | -1.2                         | BETTER |
| e. Chi-2 trans st dev        | 46              | 13.4            | 20.4              | 5.0        | -1.4                         | BETTER |
